# Supplementary material for: Design, Structural Characteristic and Antibacterial Performance of Silver-Containing Cotton Fiber Nanocomposite
Source: MDPI journal article supplement (doi:10.3390/bioengineering9120770), 2022-12-05
Supplement: s1 [file s1]

## Supplementary material

### DESIGN, STRUCTURAL CHARACTERISTIC AND ANTIBACTERIAL PERFORMANCE OF SILVER-CONTAINING COTTON FIBER NANOCOMPOSITE

Rasim Alosmanov<sup>[1]</sup>; Irada Buniyat-zadeh<sup>[1]</sup>; Mustafa Soylak<sup>[2][3][4]</sup>; Azad Shukurov<sup>[5]</sup>; Solmaz Aliyeva<sup>[6]</sup>;  
Sinan Turp<sup>[7]</sup>; Gulnara Guliyeva<sup>[8]</sup>

Rasim Alosmanov (corresponding author)

Department of Chemistry, Baku State University, Z. Khalilov Str. 23, AZ1148 Baku, Azerbaijan

+994-50-3780183; r\_alosmanov@rambler.ru

<sup>1</sup> Department of Chemistry, Baku State University, Z. Khalilov Str. 23, AZ1148 Baku, Azerbaijan

<sup>2</sup> Technology Research & Application Center (ERU-TAUM), Erciyes University, 38039 Kayseri-Turkey

<sup>3</sup> Erciyes University, Faculty of Sciences, Department of Chemistry, 38039 Kayseri, Turkey

<sup>4</sup> Turkish Academy of Sciences (TUBA), Cankaya, Ankara, Turkey

<sup>5</sup> “SOCAR Polymer” LLC, AZ5000, Sumqayit, Azerbaijan

<sup>6</sup> Scientific-Research Institute Geotechnological Problems of Oil, Gas and Chemistry, D.Aliyeva 227, AZ1010, Baku, Azerbaijan

<sup>7</sup> Bitlis Eren Univ, Tatvan Vocat High Sch, Dept Chem & Chem Proc Technol, Bitlis, Turkey

<sup>8</sup> Azerbaijan Republican Sanitary & Quarantine Center, AZ1009, Baku, Azerbaijan

#### **1. Preparation of silver-containing cotton fiber nanocomposite (cotton-OH-Ag, cotton-(PO(OH)<sub>2</sub>)(Cl)-Ag)**

Samples (cotton-OH or cotton-(PO(OH)<sub>2</sub>)(Cl) (0.1 g) were placed in a flask containing 50 ml of NaBH<sub>4</sub> solution (2.0 mM). This was immersed in an ice-bath and under intensive stirring 16.6 ml of AgNO<sub>3</sub> solution (1.0 mM) was added drop by drop. When the entire amount of the silver salt was added to the solution, it acquired a characteristic bright yellow color. The obtained cotton-OH-Ag and cotton-

(PO(OH)<sub>2</sub>)(Cl)-Ag were thoroughly rinsed with deionized water, then dried in the air, and kept in a desiccator for further characterization.

## 2. Antibacterial test

We used strains of gram-negative bacteria, *E. coli* ATCC®25922; gram-positive bacteria, *S. aureus* ATCC®25923; and fungus *C. albicans* ATCC®90028; and culture media from «Liofilchem®» (Italy) agar Mueller Hinton, Saburo, Endo, B.Parker, MacConkey.

The bacteria were cultured in Liofilchem® trypto-soy broth under aerobic conditions at 37°C for 24 hours. Equal volumes of bacterial suspension (1 ml each) were layered on Petri dishes with selective medium for each pathogen using a standard inoculum corresponding to 0.5 density by McFarland standard and containing approximately 1.5×10<sup>8</sup> colony forming units (CFU)/ml. The partially closed dishes were placed into a drying box at room temperature for 15 minutes, after which the test samples were put into them. The samples were rolled into balls, each ~ 5 mm in diameter and ~ 0.01 g in weight. The dishes were incubated at 37°C for 24 hours. The degree of sensitivity of microorganisms was determined by measuring the diameter zone of inhibition (in mm).

## 3. Scheme of the modification of cotton-OH and preparation of composites

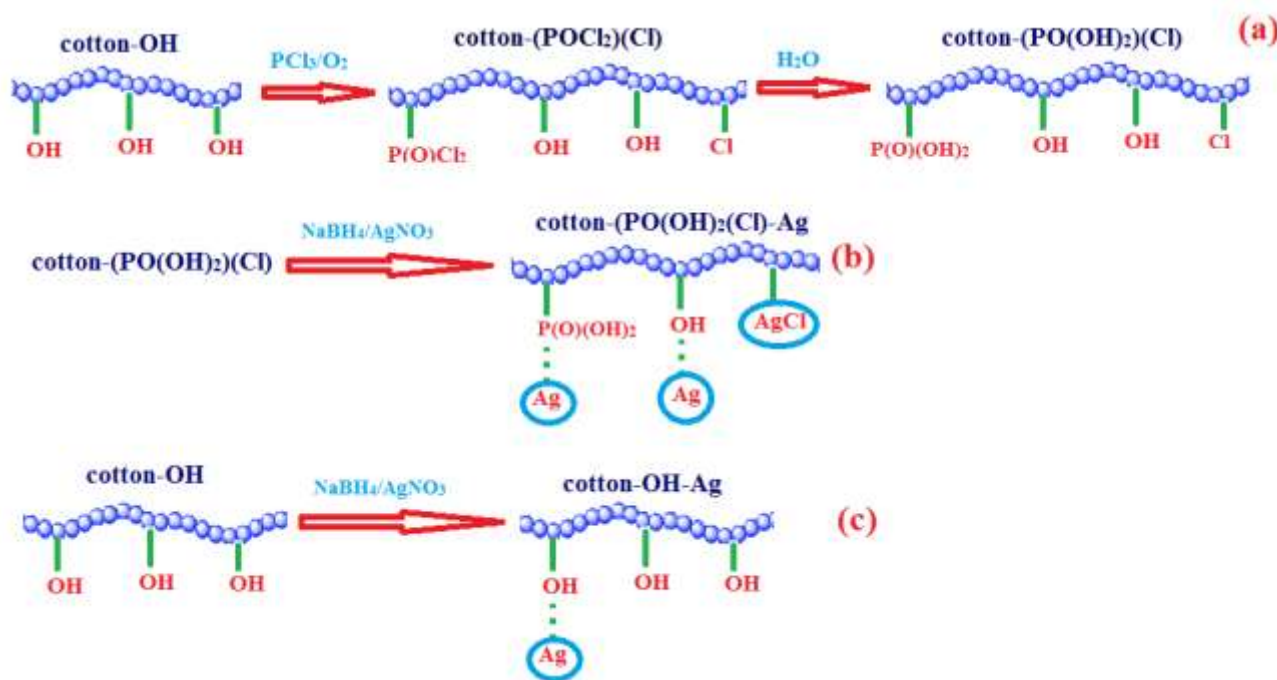

**Scheme S1.** Modification of cotton-OH (a) and preparation of composites: cotton-OH-Ag (b), cotton-(PO(OH)<sub>2</sub>)(Cl)-Ag (c)

## 4. FTIR spectra of the samples in the different range

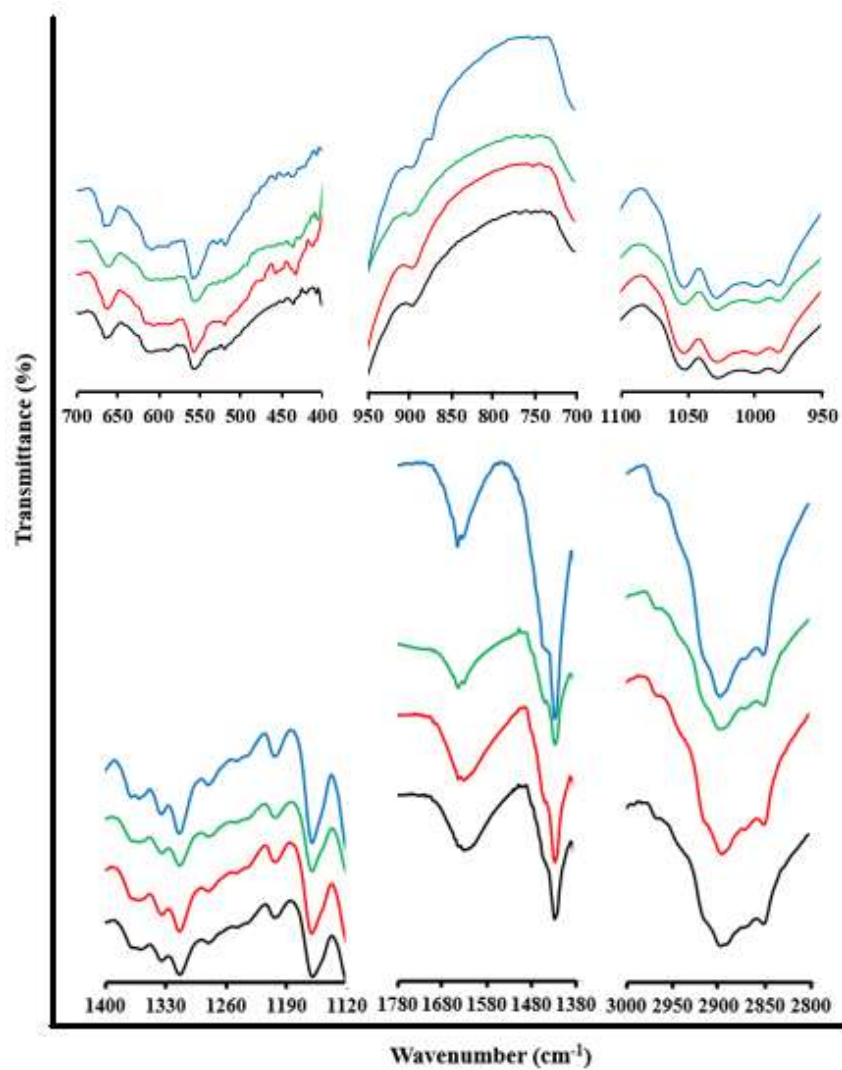

**Figure S1.** FTIR spectra of cotton-OH (black), cotton-OH-Ag (red), cotton-(PO(OH)<sub>2</sub>)(Cl) (green) and cotton-(PO(OH)<sub>2</sub>)(Cl)-Ag (blue) in the different range

##### 5. The optical bandgap for cotton-OH-Ag and cotton-(PO(OH)<sub>2</sub>)(Cl)-Ag

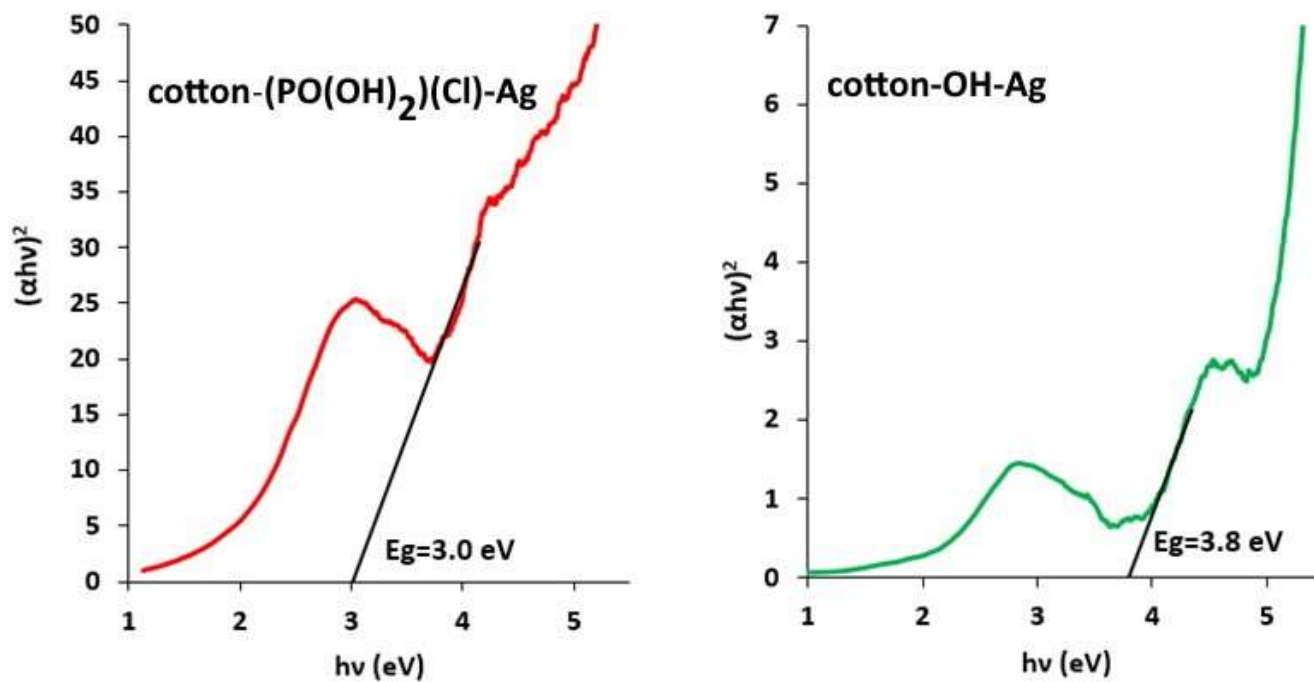

**Figure S2.** The optical bandgap for cotton-OH-Ag and cotton-(PO(OH)<sub>2</sub>)(Cl)-Ag

## 6. XRD spectra of cotton-OH and cotton-OH-Ag

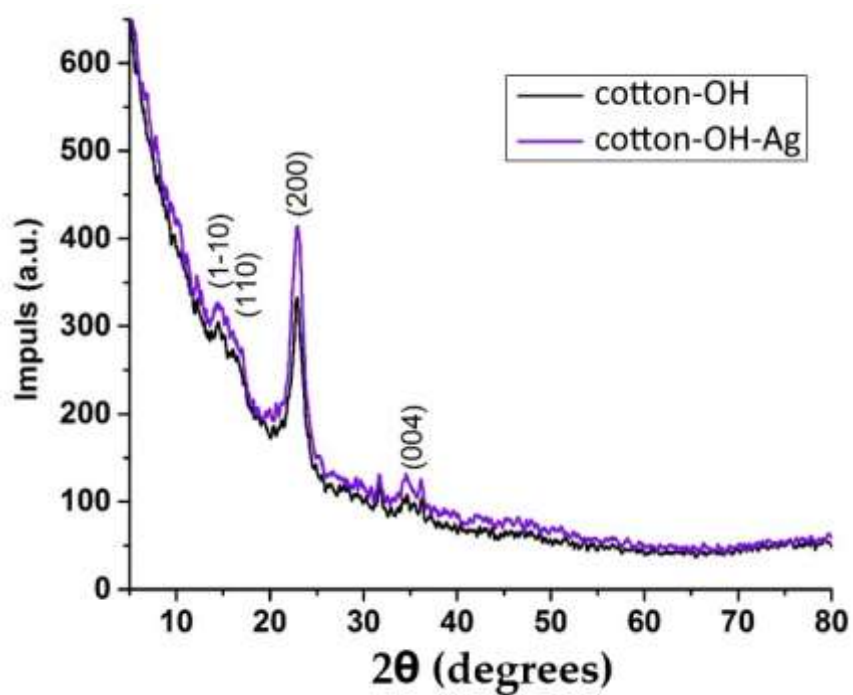

**Figure S3.** XRD spectra of cotton-OH and cotton-OH-Ag

## 7. XRD spectra of cotton-(PO(OH)<sub>2</sub>)(Cl) and cotton-(PO(OH)<sub>2</sub>)(Cl)-Ag.

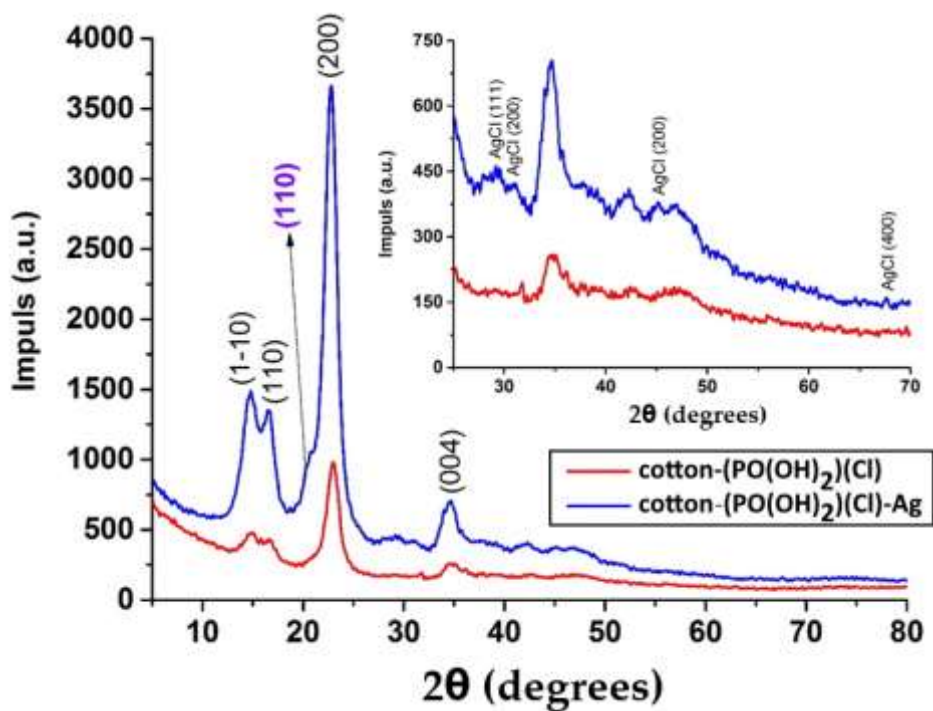

**Figure S4.** XRD spectra of cotton-(PO(OH)<sub>2</sub>)(Cl) and cotton-(PO(OH)<sub>2</sub>)(Cl)-Ag

## 8. Crystalline size and Segal CI of the samples

**Table S1.** Crystalline size and Segal CI of cotton-OH, cotton-OH-Ag, cotton-(PO(OH)<sub>2</sub>)(Cl) and cotton-(PO(OH)<sub>2</sub>)(Cl)-Ag.

| Sample                            | 2θ    | Intensity | I <sub>t</sub> | FWHM | I <sub>am</sub> | D (nm) | Segal CI (%) |
|-----------------------------------|-------|-----------|----------------|------|-----------------|--------|--------------|
| cotton-OH                         | 14.57 | 301.70    | 31.60          | 0.72 | 196.10          | 7.12   | 41.05        |
|                                   | 16.64 | 260.60    | 23.33          | 0.46 |                 |        |              |
|                                   | 22.89 | 332.64    | 176.43         | 1.19 |                 |        |              |
| cotton-OH-Ag                      | 14.65 | 323.56    | 49.44          | 0.82 | 207.13          | 6.09   | 49.86        |
|                                   | 16.96 | 273.05    | 40.76          | 0.68 |                 |        |              |
|                                   | 23.00 | 413.14    | 247.59         | 1.39 |                 |        |              |
| cotton-(PO(OH) <sub>2</sub> )(Cl) | 14.96 | 480.94    | 156.33         | 1.42 | 257.10          | 6.18   | 73.76        |
|                                   | 16.70 | 426.11    | 128.75         | 1.34 |                 |        |              |
|                                   | 23.03 | 979.90    | 751.39         | 1.37 |                 |        |              |

|                             |       |         |         |      |        |      |       |
|-----------------------------|-------|---------|---------|------|--------|------|-------|
| cotton-                     | 14.78 | 1476.82 | 915.74  | 2.13 | 642.90 | 5.76 | 82.45 |
| (PO(OH) <sub>2</sub> )(Cl)- | 16.57 | 1354.52 | 813.50  | 1.48 |        |      |       |
| Ag                          | 22.76 | 3663.80 | 3192.40 | 1.47 |        |      |       |

## 9. TG/DTG and DTA curves of samples

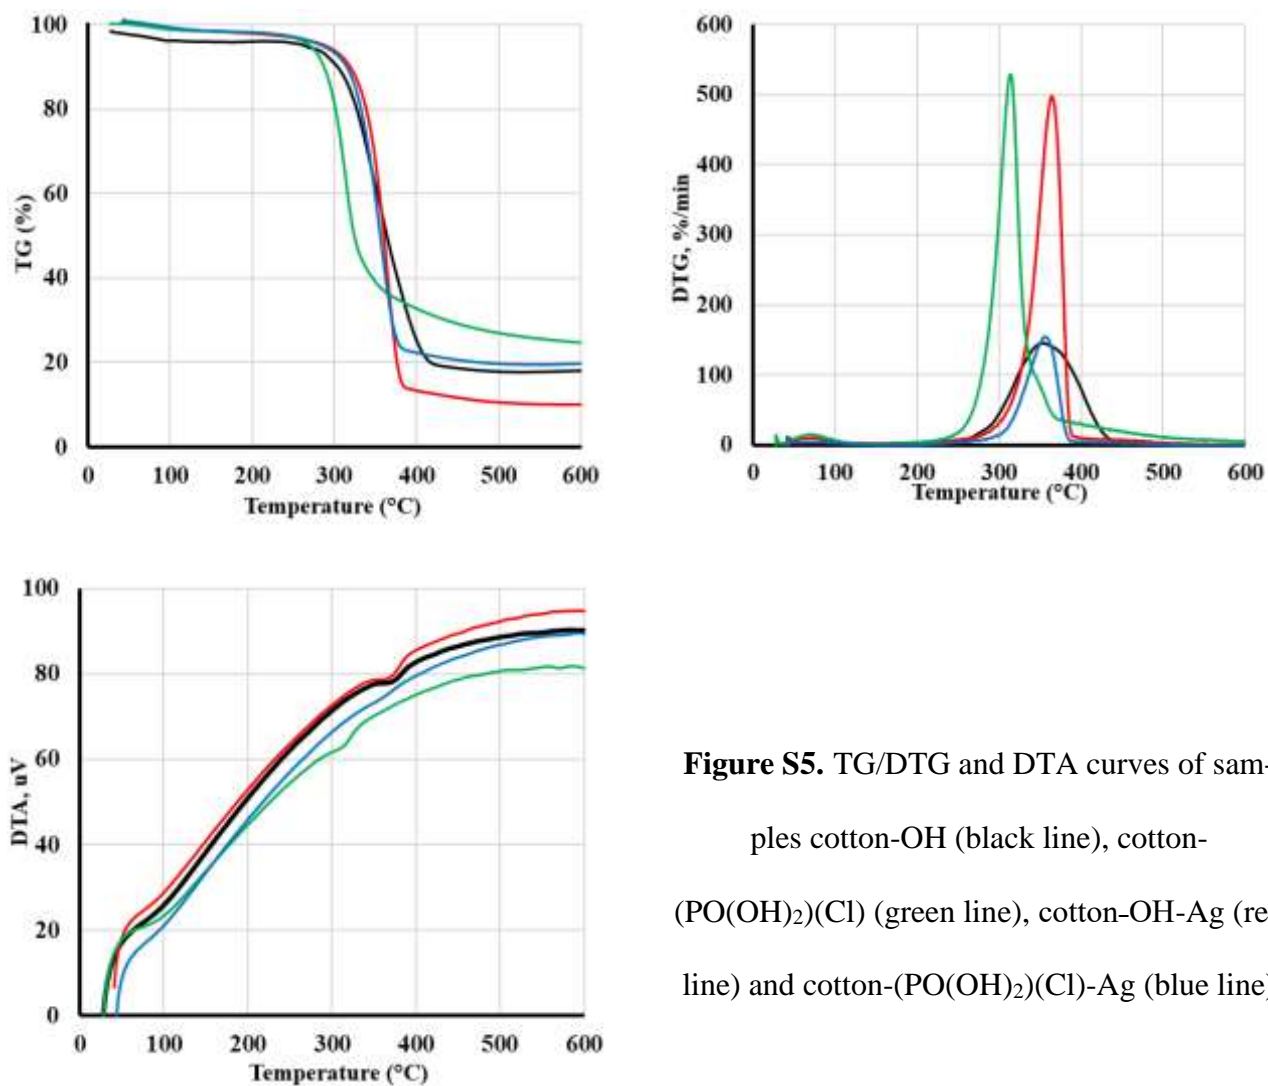

**Figure S5.** TG/DTG and DTA curves of samples cotton-OH (black line), cotton-(PO(OH)<sub>2</sub>)(Cl) (green line), cotton-OH-Ag (red line) and cotton-(PO(OH)<sub>2</sub>)(Cl)-Ag (blue line)

## 10. SEM images of the samples

## 11. EDX image for samples coated by Ag-containing nanocomposites

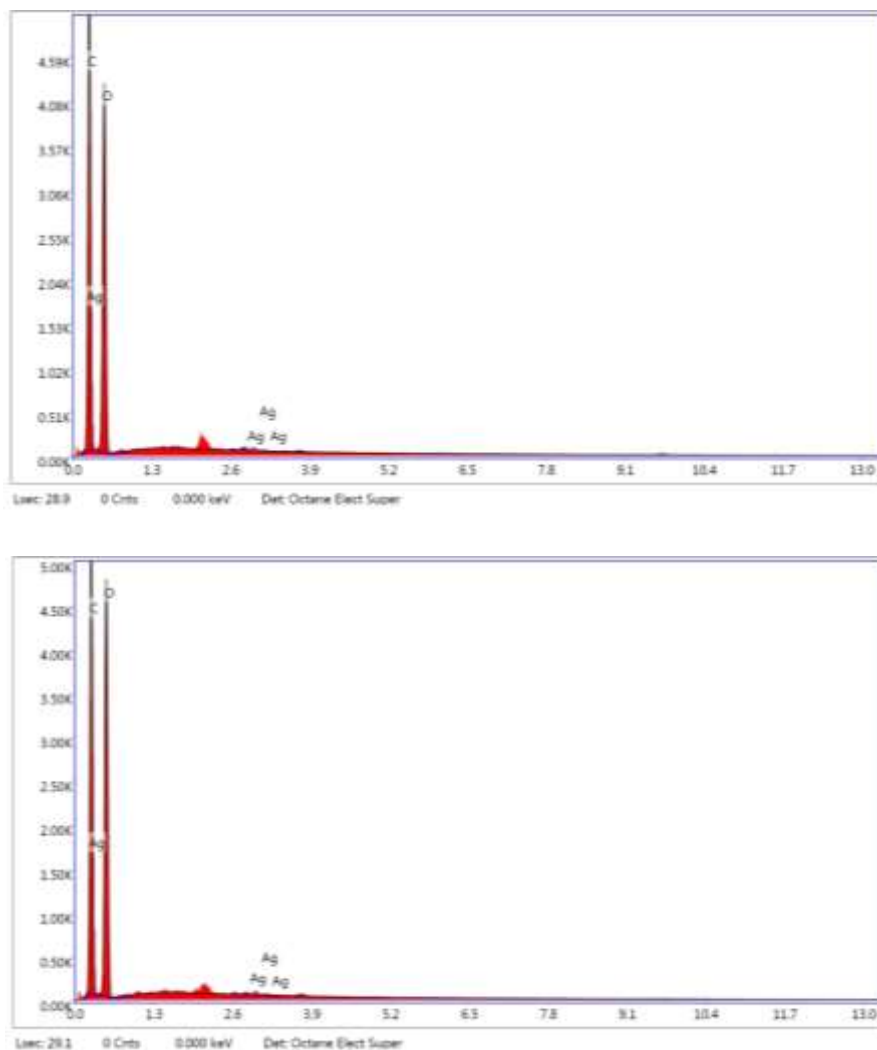

**Figure S6.** EDX image for samples coated by Ag-containing nanoparticle:  
cotton-OH-Ag (a) and cotton-(PO(OH)<sub>2</sub>)(Cl)-Ag (b).

## 12. The quantitative content of elements

**Table S2.** EDX Data of Different Cotton Fibers

| Samples                              | C, %  | O, %  | Ag, % |
|--------------------------------------|-------|-------|-------|
| cotton-OH                            | 50.89 | 49.11 | -     |
| cotton-OH-Ag                         | 47.32 | 52.31 | 0.38  |
| cotton-(PO(OH) <sub>2</sub> )(Cl)    | 49.04 | 50.96 | -     |
| cotton-(PO(OH) <sub>2</sub> )(Cl)-Ag | 46.28 | 53.30 | 0.42  |
